# Supplementary material for: End-of-life decisions and practices for very preterm infants in the Wallonia-Brussels Federation of Belgium
Source: Springer Nature journal article supplement (doi:10.1186/s12887-018-1168-x), 2018-06-26
Supplement: MOESM1 [file 15882220]

Ce questionnaire a pour objet de réaliser un inventaire des principales pratiques des équipes médicales des services NIC (Neonatal Intensive Care) en Fédération Wallonie-Bruxelles dans les situations de naissance à la limite de la viabilité (<26 semaines). Il est adressé à tous les pédiatres travaillant dans un des 11 centres NIC.

Ce questionnaire comporte 68 questions et il faut **compter environ 60 minutes** pour le compléter.

Les questions vous interrogent sur **vos pratiques et votre vécu en matière de décisions de fin de vie aux limites de la viabilité**, à trois moments clés: la période anténatale, le moment de la naissance et la période post-natale. S'agissant d'un état des lieux sur les pratiques actuelles dans les différents centres, **les questions portent bien sur ce que vous faites effectivement au jour d'aujourd'hui et pas sur ce que vous pensez que vous-même ou votre centre devrait faire...** Si vous souhaitez vous exprimer sur des souhaits éventuels, vous pourrez le faire à la fin du questionnaire, dans un cadre réservé à cette effet.

Il n'y a pas de bonne ou de mauvaise réponse, et toutes les **données collectées sont totalement anonymes**.

Nous vous remercions de votre précieuse collaboration. Vos réponses seront très utiles pour décider des actions et recherches-actions futures qui seront soutenues par le Fonds Houtman dans les centres NIC.

Au nom du comité de pilotage du projet,

**Isabelle Aujoulat**

Coordinatrice de l'étude

Institut de Recherche Santé et Société, UCL

E-mail : isabelle.aujoulat@uclouvain.be

Téléphone : 0487.66.41.49

Il y a 71 questions dans ce questionnaire

## Données personnelles

### 1 [Genre]Vous êtes ?

Veuillez sélectionner **une seule** des propositions suivantes :

- Un homme  
 Une femme

### 2 [Age]Quel est votre âge ?

Veuillez sélectionner **une seule** des propositions suivantes :

- Moins de 35 ans  
 Entre 35 et 55 ans  
 Plus de 55 ans

### 3 [ANC-METIER]Depuis combien d'années exercez-vous le métier de pédiatre (nombre d'années écoulées depuis l'obtention de votre diplôme de médecin)?

Veuillez écrire votre réponse ici :

### 4 [ANC-NEONAT]Depuis combien d'années exercez-vous votre métier en néonatalogie intensive ?

Veuillez écrire votre réponse ici :

**5 [CENTRE] Quel est le centre qui vous emploie actuellement?**

Choisissez **toutes** les réponses qui conviennent :

- Le CHR de La Citadelle
- Le CHC Clinique St-Vincent
- Le CHR de Namur
- Le CHU Tivoli
- Le CHU de Charleroi/Hôpital Civil
- Le Grand Hôpital de Charleroi
- Le CHU Saint-Pierre
- L'HUDERF
- L'Hôpital Erasme
- Les Cliniques universitaires Saint-Luc
- Le CHIREC, Clinique Edith Cavell
- Autre:

L'information qui vous est demandée ici est importante pour nous permettre de vous restituer des résultats individualisés, concernant VOTRE centre. Ainsi, chaque participant recevra le rapport général concernant l'ensemble des 11 centres et une synthèse des résultats concernant son propre centre. Les données plus personnelles (âge, sexe, ancienneté dans le métier...) ne seront pas reprises dans les rapports individualisés mais présentées uniquement dans le rapport général pour décrire l'échantillon total des répondants. Les rapports individualisés ne seront transmis qu'aux centres concernés.

**6 [CENTRE-AUTRE] Avez-vous, auparavant, travaillé dans un autre centre NIC (Neonatal Intensive Care) ?**

Veuillez sélectionner **une seule** des propositions suivantes :

- Oui, en Belgique
- Oui, à l'étranger
- Oui, en Belgique et à l'étranger
- Non

**7 [CENTRE-AUTRE2] Si oui, merci de préciser à quel moment de votre carrière ?**

Choisissez **toutes** les réponses qui conviennent :

- pendant les 5 années de formation de pédiatrie
- pendant la formation de néonatalogie
- après la reconnaissance de néonatalogue

## La prise en charge en PERIODE ANTENATALE

Les questions qui suivent vous interrogent sur votre expérience de prise en charge EN PERIODE ANTENATALE. Nous vous demandons de décrire votre expérience personnelle, le plus honnêtement possible, dans le centre dans lequel vous travaillez actuellement.

### 8 [DEC-ANT1]

**Vous arrive-t-il de prendre des décisions anticipées (avant la naissance) de réanimation à la naissance ?**

Veillez sélectionner **une seule** des propositions suivantes :

- Oui  
 Non

### 9 [DEC-ANT2] Qui est associé à la DISCUSSION des décisions anticipées de réanimation (ou non) à la naissance (consulté)?

Choisissez la réponse appropriée pour chaque élément :

|                           | Toujours              | Souvent               | Parfois               | Jamais                | Sans avis             |
|---------------------------|-----------------------|-----------------------|-----------------------|-----------------------|-----------------------|
| Gynécologue-obstétricien  | <input type="radio"/> | <input type="radio"/> | <input type="radio"/> | <input type="radio"/> | <input type="radio"/> |
| Autre médecin spécialiste | <input type="radio"/> | <input type="radio"/> | <input type="radio"/> | <input type="radio"/> | <input type="radio"/> |
| Parents                   | <input type="radio"/> | <input type="radio"/> | <input type="radio"/> | <input type="radio"/> | <input type="radio"/> |
| Néonatalogue              | <input type="radio"/> | <input type="radio"/> | <input type="radio"/> | <input type="radio"/> | <input type="radio"/> |
| Médecin traitant          | <input type="radio"/> | <input type="radio"/> | <input type="radio"/> | <input type="radio"/> | <input type="radio"/> |
| Psychologue               | <input type="radio"/> | <input type="radio"/> | <input type="radio"/> | <input type="radio"/> | <input type="radio"/> |
| Sage-femme                | <input type="radio"/> | <input type="radio"/> | <input type="radio"/> | <input type="radio"/> | <input type="radio"/> |
| Infirmière                | <input type="radio"/> | <input type="radio"/> | <input type="radio"/> | <input type="radio"/> | <input type="radio"/> |
| Comité d'éthique          | <input type="radio"/> | <input type="radio"/> | <input type="radio"/> | <input type="radio"/> | <input type="radio"/> |
| Autre                     | <input type="radio"/> | <input type="radio"/> | <input type="radio"/> | <input type="radio"/> | <input type="radio"/> |

### 10 [DEC-ANTautre1] Si vous avez coché "autre" ou "autre médecin spécialiste", merci de préciser qui:

Veillez écrire votre réponse ici :

### 11 [DEC-ANT3] Qui est associé à la DECISION en cas de décision anticipée de réanimation (ou non) à la naissance?

Choisissez la réponse appropriée pour chaque élément :

|                           | Toujours              | Souvent               | Parfois               | Jamais                | Sans avis             |
|---------------------------|-----------------------|-----------------------|-----------------------|-----------------------|-----------------------|
| Gynécologue-obstétricien  | <input type="radio"/> | <input type="radio"/> | <input type="radio"/> | <input type="radio"/> | <input type="radio"/> |
| Autre médecin spécialiste | <input type="radio"/> | <input type="radio"/> | <input type="radio"/> | <input type="radio"/> | <input type="radio"/> |
| Parents                   | <input type="radio"/> | <input type="radio"/> | <input type="radio"/> | <input type="radio"/> | <input type="radio"/> |
| Néonatalogue              | <input type="radio"/> | <input type="radio"/> | <input type="radio"/> | <input type="radio"/> | <input type="radio"/> |
| Médecin traitant          | <input type="radio"/> | <input type="radio"/> | <input type="radio"/> | <input type="radio"/> | <input type="radio"/> |
| Psychologue               | <input type="radio"/> | <input type="radio"/> | <input type="radio"/> | <input type="radio"/> | <input type="radio"/> |
| Sage-femme                | <input type="radio"/> | <input type="radio"/> | <input type="radio"/> | <input type="radio"/> | <input type="radio"/> |
| Infirmière                | <input type="radio"/> | <input type="radio"/> | <input type="radio"/> | <input type="radio"/> | <input type="radio"/> |
| Comité d'éthique          | <input type="radio"/> | <input type="radio"/> | <input type="radio"/> | <input type="radio"/> | <input type="radio"/> |
| Autre                     | <input type="radio"/> | <input type="radio"/> | <input type="radio"/> | <input type="radio"/> | <input type="radio"/> |

### 12 [DEC-ANTautre2] Si vous avez coché "autre" ou "autre médecin spécialiste" à la question précédente, merci de préciser qui:

Veillez écrire votre réponse ici :

### 13 [POIDS-DEC] Qui a le plus de poids dans la décision finale de réanimation (ou non) à la naissance ? (Veillez classer par ordre d'importance de 1 à 4, 1 étant le plus important et 4 le moins important)

Veillez saisir un nombre compris entre 1 et 4 pour chaque élément :

|                   | Les parents          | L'équipe obstétricale | Les néonatalogues    | Autre ou ça dépend   |
|-------------------|----------------------|-----------------------|----------------------|----------------------|
| AVANT 26 semaines | <input type="text"/> | <input type="text"/>  | <input type="text"/> | <input type="text"/> |
| APRES 26 semaines | <input type="text"/> | <input type="text"/>  | <input type="text"/> | <input type="text"/> |

Classer par ordre d'importance de 1 à 4, 1 étant le plus important et 4 le moins important.

**14 [POIDS-DEC2] Si vous avez choisi "autre ou ça dépend" à la question précédente, pouvez vous commenter ?**

Veuillez écrire votre réponse ici :

**15 [PROTOC]**

**Existe-t-il un protocole écrit ou une procédure standardisée pour l'anticipation anténatale d'une réanimation (ou non) à la naissance ?**

Veuillez sélectionner **une seule** des propositions suivantes :

- Oui  
 Non

**16 [TRANS-mic]**

**Dans votre centre, à partir de quel âge gestationnel l'équipe du MIC (Maternal Intensive Care) accepte-t-elle un transfert maternel in utero en vue d'une possible réanimation du bébé ?**

Veuillez sélectionner **une seule** des propositions suivantes :

- moins de 22 semaines  
 22 semaines  
 23 semaines  
 24 semaines  
 25 semaines  
 26 semaines et plus

**17 [TRANS-Nic]**

**Dans votre centre, à partir de quel âge gestationnel l'équipe des néonatalogues accepte-t-elle de prendre le bébé en réanimation ?**

Veuillez sélectionner **une seule** des propositions suivantes :

- moins de 22 semaines  
 22 semaines  
 23 semaines  
 24 semaines  
 25 semaines  
 26 semaines et plus

**18 [MAT-CORT]**

**Dans votre centre, à partir de quel âge gestationnel commencez-vous une maturation par corticoïdes ?**

Veuillez sélectionner **une seule** des propositions suivantes :

- moins de 22 semaines  
 22 semaines  
 23 semaines  
 entre 23 et 24 semaines  
 24 semaines  
 25 semaines  
 26 semaines et plus

**19 [ANAMN]**

**Dans votre centre, quels critères anamnestiques sont pris en compte pour prendre la décision de réanimer ou non à la naissance?**

Choisissez la réponse appropriée pour chaque élément :

|                                                          | Toujours              | Souvent               | Parfois               | Jamais                | Je ne sais pas        |
|----------------------------------------------------------|-----------------------|-----------------------|-----------------------|-----------------------|-----------------------|
| Singleton / multiple                                     | <input type="radio"/> | <input type="radio"/> | <input type="radio"/> | <input type="radio"/> | <input type="radio"/> |
| Sexe (fille / garçon)                                    | <input type="radio"/> | <input type="radio"/> | <input type="radio"/> | <input type="radio"/> | <input type="radio"/> |
| Phénotype (couleur de peau noire/blanche)                | <input type="radio"/> | <input type="radio"/> | <input type="radio"/> | <input type="radio"/> | <input type="radio"/> |
| Poids à la naissance ou retard de croissance intrautérin | <input type="radio"/> | <input type="radio"/> | <input type="radio"/> | <input type="radio"/> | <input type="radio"/> |
| Milieu socioéconomique favorable ou défavorable          | <input type="radio"/> | <input type="radio"/> | <input type="radio"/> | <input type="radio"/> | <input type="radio"/> |
| Toxicomanie maternelle                                   | <input type="radio"/> | <input type="radio"/> | <input type="radio"/> | <input type="radio"/> | <input type="radio"/> |
| Souffrance fœtale aigüe                                  | <input type="radio"/> | <input type="radio"/> | <input type="radio"/> | <input type="radio"/> | <input type="radio"/> |
| Présence de malformation significative                   | <input type="radio"/> | <input type="radio"/> | <input type="radio"/> | <input type="radio"/> | <input type="radio"/> |
| Age maternel                                             | <input type="radio"/> | <input type="radio"/> | <input type="radio"/> | <input type="radio"/> | <input type="radio"/> |
| Passé obstétrical                                        | <input type="radio"/> | <input type="radio"/> | <input type="radio"/> | <input type="radio"/> | <input type="radio"/> |
| Chorioamniotite, autre infection                         | <input type="radio"/> | <input type="radio"/> | <input type="radio"/> | <input type="radio"/> | <input type="radio"/> |
| Conviction philosophique ou religieuse des parents       | <input type="radio"/> | <input type="radio"/> | <input type="radio"/> | <input type="radio"/> | <input type="radio"/> |
| Autre                                                    | <input type="radio"/> | <input type="radio"/> | <input type="radio"/> | <input type="radio"/> | <input type="radio"/> |

**20 [CRIT-autre] Pouvez-vous indiquer quel(s) autre(s) critère(s) sont éventuellement pris en compte?**

Veuillez écrire votre réponse ici :

**21 [FOMAL-DEC] Comment est formalisée et consignée la décision finale de réanimation ou non ?**

Choisissez la réponse appropriée pour chaque élément :

|                                                                                             | Toujours              | Souvent               | Parfois               | Jamais                | Je ne sais pas        |
|---------------------------------------------------------------------------------------------|-----------------------|-----------------------|-----------------------|-----------------------|-----------------------|
| Les parents sont invités à signer la décision de réanimation ou non                         | <input type="radio"/> | <input type="radio"/> | <input type="radio"/> | <input type="radio"/> | <input type="radio"/> |
| La décision est inscrite dans le dossier maternel                                           | <input type="radio"/> | <input type="radio"/> | <input type="radio"/> | <input type="radio"/> | <input type="radio"/> |
| Les détails de la discussion qui précède la décision sont inscrits dans le dossier maternel | <input type="radio"/> | <input type="radio"/> | <input type="radio"/> | <input type="radio"/> | <input type="radio"/> |

## La prise en charge A LA NAISSANCE

Les questions qui suivent vous interrogent sur votre expérience de prise en charge **AU MOMENT DE LA NAISSANCE**. Nous vous demandons de décrire votre expérience personnelle, le plus honnêtement possible, dans le centre dans lequel vous travaillez actuellement.

### 22 [NON-RESPECT DEC] En cas de décision anténatale de réanimation à la naissance, arrive-t-il qu'un médecin de garde n'applique pas la décision qui avait été prise en période anténatale ?

Veuillez sélectionner **une seule** des propositions suivantes :

- Oui  
 Non

### 23 [CRIT-MODIF DEC] Une décision anténatale de réanimation (ou non) peut-elle être remise en cause par:

Choisissez la réponse appropriée pour chaque élément :

|                                                                    | OUI                   | NON                   | Je ne sais pas        |
|--------------------------------------------------------------------|-----------------------|-----------------------|-----------------------|
| L'évaluation clinique de la maturité de l'enfant                   | <input type="radio"/> | <input type="radio"/> | <input type="radio"/> |
| La vitalité du bébé à la naissance                                 | <input type="radio"/> | <input type="radio"/> | <input type="radio"/> |
| La présence de malformation(s) non décelée(s) pendant la grossesse | <input type="radio"/> | <input type="radio"/> | <input type="radio"/> |
| Autre                                                              | <input type="radio"/> | <input type="radio"/> | <input type="radio"/> |

### 24 [CRIT-MODIF2] Si vous avez répondu "autre" à la question précédente, merci de préciser :

Veuillez écrire votre réponse ici :

### 25 [ABSENCE-DEC] En l'absence de décision anténatale de réanimation (ou non) à la naissance, à partir de quel âge gestationnel appelle-t-on le néonatalogue ?

Choisissez la réponse appropriée pour chaque élément :

|                      | Néonatalogue senior en premier recours | Néonatalogue junior (assistant en pédiatrie ou médecin en formation) en premier recours | L'un ou l'autre suivant disponibilité | Ni l'un ni l'autre    | Je ne sais pas        |
|----------------------|----------------------------------------|-----------------------------------------------------------------------------------------|---------------------------------------|-----------------------|-----------------------|
| moins de 22 semaines | <input type="radio"/>                  | <input type="radio"/>                                                                   | <input type="radio"/>                 | <input type="radio"/> | <input type="radio"/> |
| 22 semaines          | <input type="radio"/>                  | <input type="radio"/>                                                                   | <input type="radio"/>                 | <input type="radio"/> | <input type="radio"/> |
| 23 semaines          | <input type="radio"/>                  | <input type="radio"/>                                                                   | <input type="radio"/>                 | <input type="radio"/> | <input type="radio"/> |
| 24 semaines          | <input type="radio"/>                  | <input type="radio"/>                                                                   | <input type="radio"/>                 | <input type="radio"/> | <input type="radio"/> |
| 25 semaines          | <input type="radio"/>                  | <input type="radio"/>                                                                   | <input type="radio"/>                 | <input type="radio"/> | <input type="radio"/> |
| 26 semaines et plus  | <input type="radio"/>                  | <input type="radio"/>                                                                   | <input type="radio"/>                 | <input type="radio"/> | <input type="radio"/> |

### 26 [QUI-DEC]

#### Qui est associé à la décision de réanimation (ou non) en cas de naissance urgente sans décision anticipée ?

Choisissez la réponse appropriée pour chaque élément :

|                           | Toujours              | Souvent               | Parfois               | Jamais                | Je ne sais pas        |
|---------------------------|-----------------------|-----------------------|-----------------------|-----------------------|-----------------------|
| Gynécologue-obstétricien  | <input type="radio"/> | <input type="radio"/> | <input type="radio"/> | <input type="radio"/> | <input type="radio"/> |
| Autre médecin spécialiste | <input type="radio"/> | <input type="radio"/> | <input type="radio"/> | <input type="radio"/> | <input type="radio"/> |
| Parents                   | <input type="radio"/> | <input type="radio"/> | <input type="radio"/> | <input type="radio"/> | <input type="radio"/> |
| Néonatalogue              | <input type="radio"/> | <input type="radio"/> | <input type="radio"/> | <input type="radio"/> | <input type="radio"/> |
| Médecin traitant          | <input type="radio"/> | <input type="radio"/> | <input type="radio"/> | <input type="radio"/> | <input type="radio"/> |
| Psychologue               | <input type="radio"/> | <input type="radio"/> | <input type="radio"/> | <input type="radio"/> | <input type="radio"/> |
| Sage-femme                | <input type="radio"/> | <input type="radio"/> | <input type="radio"/> | <input type="radio"/> | <input type="radio"/> |
| Infirmière                | <input type="radio"/> | <input type="radio"/> | <input type="radio"/> | <input type="radio"/> | <input type="radio"/> |
| Comité d'éthique          | <input type="radio"/> | <input type="radio"/> | <input type="radio"/> | <input type="radio"/> | <input type="radio"/> |
| Autre                     | <input type="radio"/> | <input type="radio"/> | <input type="radio"/> | <input type="radio"/> | <input type="radio"/> |

**27 [QUI-DEcautre]** Si vous avez indiqué "autre" ou "un autre médecin spécialiste" à la question précédente, merci de préciser:

Veuillez écrire votre réponse ici :

**28 [ANAMN]**

**Quels critères anamnestiques sont pris en compte pour prendre la décision de réanimer ou non en cas de naissance urgente ?**

Choisissez la réponse appropriée pour chaque élément :

|                                                          | Toujours              | Souvent               | Parfois               | Jamais                | Je ne sais pas        |
|----------------------------------------------------------|-----------------------|-----------------------|-----------------------|-----------------------|-----------------------|
| Singleton / multiple                                     | <input type="radio"/> | <input type="radio"/> | <input type="radio"/> | <input type="radio"/> | <input type="radio"/> |
| Sexe (fille / garçon)                                    | <input type="radio"/> | <input type="radio"/> | <input type="radio"/> | <input type="radio"/> | <input type="radio"/> |
| Phénotype (couleur de peau noire/blanche)                | <input type="radio"/> | <input type="radio"/> | <input type="radio"/> | <input type="radio"/> | <input type="radio"/> |
| Poids à la naissance ou retard de croissance intrautérin | <input type="radio"/> | <input type="radio"/> | <input type="radio"/> | <input type="radio"/> | <input type="radio"/> |
| Milieu socioéconomique favorable ou défavorable          | <input type="radio"/> | <input type="radio"/> | <input type="radio"/> | <input type="radio"/> | <input type="radio"/> |
| Toxicomanie maternelle                                   | <input type="radio"/> | <input type="radio"/> | <input type="radio"/> | <input type="radio"/> | <input type="radio"/> |
| Souffrance fœtale aigüe                                  | <input type="radio"/> | <input type="radio"/> | <input type="radio"/> | <input type="radio"/> | <input type="radio"/> |
| Présence de malformation significative                   | <input type="radio"/> | <input type="radio"/> | <input type="radio"/> | <input type="radio"/> | <input type="radio"/> |
| Age maternel                                             | <input type="radio"/> | <input type="radio"/> | <input type="radio"/> | <input type="radio"/> | <input type="radio"/> |
| Passé obstétrical                                        | <input type="radio"/> | <input type="radio"/> | <input type="radio"/> | <input type="radio"/> | <input type="radio"/> |
| Chorioamniotite, autre infection                         | <input type="radio"/> | <input type="radio"/> | <input type="radio"/> | <input type="radio"/> | <input type="radio"/> |
| Conviction philosophique ou religieuse des parents       | <input type="radio"/> | <input type="radio"/> | <input type="radio"/> | <input type="radio"/> | <input type="radio"/> |

**29 [CRIT-autre]** Si d'autres critères interviennent dans la décision de réanimer (ou non) en cas de naissance urgente, merci de préciser lesquels:

Veuillez écrire votre réponse ici :

**30 [REA-ATTENTE]**

**Vous arrive-t-il de réaliser une réanimation d'attente, le temps de clarifier la situation (attitude des parents, bébé très dynamique, âge gestationnel incertain, anamnèse lacunaire)?**

Veuillez sélectionner **une seule** des propositions suivantes :

- Oui  
 Non

**31 [PALLIATIF] En cas de décision de non-réanimation, qui se charge des soins palliatifs?**

Choisissez la réponse appropriée pour chaque élément :

|                      | Sage-femme            | Gynécologue-obstétricien | Néonatalogue senior   | Néonatalogue junior   | Infirmière            | Autre ou ça dépend    |
|----------------------|-----------------------|--------------------------|-----------------------|-----------------------|-----------------------|-----------------------|
| moins de 22 semaines | <input type="radio"/> | <input type="radio"/>    | <input type="radio"/> | <input type="radio"/> | <input type="radio"/> | <input type="radio"/> |
| 22 semaines          | <input type="radio"/> | <input type="radio"/>    | <input type="radio"/> | <input type="radio"/> | <input type="radio"/> | <input type="radio"/> |
| 23 semaines          | <input type="radio"/> | <input type="radio"/>    | <input type="radio"/> | <input type="radio"/> | <input type="radio"/> | <input type="radio"/> |
| 24 semaines          | <input type="radio"/> | <input type="radio"/>    | <input type="radio"/> | <input type="radio"/> | <input type="radio"/> | <input type="radio"/> |
| 25 semaines          | <input type="radio"/> | <input type="radio"/>    | <input type="radio"/> | <input type="radio"/> | <input type="radio"/> | <input type="radio"/> |
| 26 semaines et plus  | <input type="radio"/> | <input type="radio"/>    | <input type="radio"/> | <input type="radio"/> | <input type="radio"/> | <input type="radio"/> |

**32 [PALLIA-autre] Si vous avez indiqué "autre ou ça dépend" à la question précédente, merci de préciser :**

Veuillez écrire votre réponse ici :

**33 [LIEU-PALLIAT] Où se passent les soins palliatifs ?**

Choisissez la réponse appropriée pour chaque élément :

|                              | OUI                   | NON                   | Autre ou ça dépend    |
|------------------------------|-----------------------|-----------------------|-----------------------|
| Dans la salle d'accouchement | <input type="radio"/> | <input type="radio"/> | <input type="radio"/> |
| Dans le service néonatal     | <input type="radio"/> | <input type="radio"/> | <input type="radio"/> |

**34 [LIEU-autre] Si vous avez indiqué "autre ou ça dépend", merci de préciser:**

Veuillez écrire votre réponse ici :

**35 [PROTOC] Avez-vous un protocole écrit ou une procédure standardisée pour assurer le confort du bébé dans le cadre du suivi en soins palliatifs ?**

Veuillez choisir toutes les réponses qui conviennent et laissez un commentaire :

 Oui, un protocole médicamenteux Oui, un autre type de protocole. Merci de préciser lequel : Non Je ne sais pas

## La prise en charge en PERIODE POSTNATALE

Les questions qui suivent vous interrogent sur votre expérience de prise en charge APRES LA NAISSANCE. Nous vous demandons de décrire votre expérience personnelle, le plus honnêtement possible, dans le centre dans lequel vous travaillez actuellement.

### 36 [DEC-VIAB]

**S'il y a constat que la poursuite de soins est déraisonnable, le processus décisionnel de passage en soins palliatifs est-il comparable si l'enfant est au seuil de la viabilité (< 26 semaines) ou s'il est plus âgé (> 26 semaines) ?**

Veuillez sélectionner **une seule** des propositions suivantes :

- OUI  
 NON  
 Je ne sais pas

### 37 [DEC-POURS]

**Qui est inclus dans le processus décisionnel relatif à la poursuite ou l'arrêt des soins ?**

Choisissez la réponse appropriée pour chaque élément :

|                           | Toujours              | Souvent               | Parfois               | Jamais                | Sans avis             |
|---------------------------|-----------------------|-----------------------|-----------------------|-----------------------|-----------------------|
| Néonatalogue              | <input type="radio"/> | <input type="radio"/> | <input type="radio"/> | <input type="radio"/> | <input type="radio"/> |
| Gynécologue-obstétricien  | <input type="radio"/> | <input type="radio"/> | <input type="radio"/> | <input type="radio"/> | <input type="radio"/> |
| Autre médecin spécialiste | <input type="radio"/> | <input type="radio"/> | <input type="radio"/> | <input type="radio"/> | <input type="radio"/> |
| Parents                   | <input type="radio"/> | <input type="radio"/> | <input type="radio"/> | <input type="radio"/> | <input type="radio"/> |
| Médecin traitant          | <input type="radio"/> | <input type="radio"/> | <input type="radio"/> | <input type="radio"/> | <input type="radio"/> |
| Psychologue               | <input type="radio"/> | <input type="radio"/> | <input type="radio"/> | <input type="radio"/> | <input type="radio"/> |
| Sage-femme                | <input type="radio"/> | <input type="radio"/> | <input type="radio"/> | <input type="radio"/> | <input type="radio"/> |
| Infirmière                | <input type="radio"/> | <input type="radio"/> | <input type="radio"/> | <input type="radio"/> | <input type="radio"/> |
| Comité d'éthique          | <input type="radio"/> | <input type="radio"/> | <input type="radio"/> | <input type="radio"/> | <input type="radio"/> |
| Autre                     | <input type="radio"/> | <input type="radio"/> | <input type="radio"/> | <input type="radio"/> | <input type="radio"/> |

**38 [DEC-autre] Si vous avez indiqué "autre" ou "autre médecin spécialiste" à la question précédente, merci de préciser qui :**

Veuillez écrire votre réponse ici :

**39 [DEC-ARRET] En fonction de l'âge gestationnel, qui prend formellement la décision d'arrêter les soins ?**

Choisissez la réponse appropriée pour chaque élément :

|                          | AVANT 26 semaines ?   |                       |                       |                       |                       | APRES 26 semaines ?   |                       |                       |                       |                       |
|--------------------------|-----------------------|-----------------------|-----------------------|-----------------------|-----------------------|-----------------------|-----------------------|-----------------------|-----------------------|-----------------------|
|                          | Toujours              | Souvent               | Parfois               | Jamais                | Sans avis             | Toujours              | Souvent               | Parfois               | Jamais                | Sans avis             |
| Parents                  | <input type="radio"/> | <input type="radio"/> | <input type="radio"/> | <input type="radio"/> | <input type="radio"/> | <input type="radio"/> | <input type="radio"/> | <input type="radio"/> | <input type="radio"/> | <input type="radio"/> |
| Néonatalogue             | <input type="radio"/> | <input type="radio"/> | <input type="radio"/> | <input type="radio"/> | <input type="radio"/> | <input type="radio"/> | <input type="radio"/> | <input type="radio"/> | <input type="radio"/> | <input type="radio"/> |
| Gynécologue-obstétricien | <input type="radio"/> | <input type="radio"/> | <input type="radio"/> | <input type="radio"/> | <input type="radio"/> | <input type="radio"/> | <input type="radio"/> | <input type="radio"/> | <input type="radio"/> | <input type="radio"/> |
| Autre                    | <input type="radio"/> | <input type="radio"/> | <input type="radio"/> | <input type="radio"/> | <input type="radio"/> | <input type="radio"/> | <input type="radio"/> | <input type="radio"/> | <input type="radio"/> | <input type="radio"/> |

**40 [DESAC] En cas de désaccord, quelle est la procédure de prise de décision ?**

Veuillez écrire votre(vos) réponse(s) ici :

AVANT 26 semaines

APRES 26 semaines

**41 [EXP]Avez-vous une équipe d'experts extérieurs à votre service pour vous aider à prendre la décision de réanimation ou non :**Veuillez sélectionner **une seule** des propositions suivantes :

- Oui
- Non

**42 [OUI-PREC]Si oui, merci de préciser:**

Veuillez écrire votre réponse ici :

**43 [EXP2]Avez-vous une équipe d'experts extérieurs à votre service pour vous aider à pratiquer les soins palliatifs?**Veuillez sélectionner **une seule** des propositions suivantes :

- Oui
- Non

**44 [OUI-PREC2]Si oui, merci de préciser :**

Veuillez écrire votre réponse ici :

**45 [CRIT-Arrêt]La décision d'arrêt des soins curatifs est-elle influencée par?**

Choisissez la réponse appropriée pour chaque élément :

|                                                     | Toujours              | Presque toujours      | Souvent               | Parfois               | Exceptionnellement    | Jamais                |
|-----------------------------------------------------|-----------------------|-----------------------|-----------------------|-----------------------|-----------------------|-----------------------|
| La qualité de vie ultérieure supposée du bébé       | <input type="radio"/> | <input type="radio"/> | <input type="radio"/> | <input type="radio"/> | <input type="radio"/> | <input type="radio"/> |
| La qualité de vie ultérieure supposée de la famille | <input type="radio"/> | <input type="radio"/> | <input type="radio"/> | <input type="radio"/> | <input type="radio"/> | <input type="radio"/> |
| Le pronostic vital à +/- brève échéance engagé      | <input type="radio"/> | <input type="radio"/> | <input type="radio"/> | <input type="radio"/> | <input type="radio"/> | <input type="radio"/> |
| Le pronostic morbide ultérieur                      | <input type="radio"/> | <input type="radio"/> | <input type="radio"/> | <input type="radio"/> | <input type="radio"/> | <input type="radio"/> |
| Le vécu parental au moment de la naissance          | <input type="radio"/> | <input type="radio"/> | <input type="radio"/> | <input type="radio"/> | <input type="radio"/> | <input type="radio"/> |
| Autre                                               | <input type="radio"/> | <input type="radio"/> | <input type="radio"/> | <input type="radio"/> | <input type="radio"/> | <input type="radio"/> |

**46 [CRIT-autre]Si vous avez indiqué "autre" à la question précédente, merci de préciser :**

Veuillez écrire votre réponse ici :

**47 [PROJ-THER]****Construisez-vous pour chaque enfant à la limite de viabilité un projet thérapeutique? Merci de préciser en fonction de l'âge gestationnel.**

Choisissez la réponse appropriée pour chaque élément :

|                            | AVANT 26 semaines     |                       |                       |                       | APRES 26 semaines     |                       |                       |                       |
|----------------------------|-----------------------|-----------------------|-----------------------|-----------------------|-----------------------|-----------------------|-----------------------|-----------------------|
|                            | OUI                   | NON                   | Ca dépend             | Je ne sais pas        | OUI                   | NON                   | Ca dépend             | Je ne sais pas        |
| En cas de soins curatifs   | <input type="radio"/> | <input type="radio"/> | <input type="radio"/> | <input type="radio"/> | <input type="radio"/> | <input type="radio"/> | <input type="radio"/> | <input type="radio"/> |
| En cas de soins palliatifs | <input type="radio"/> | <input type="radio"/> | <input type="radio"/> | <input type="radio"/> | <input type="radio"/> | <input type="radio"/> | <input type="radio"/> | <input type="radio"/> |

**48 [EVOL] Si un projet thérapeutique existe, est-il évolutif ?**

Veillez sélectionner **une seule** des propositions suivantes :

- OUI
- NON
- Ca dépend
- Je ne sais pas

Faites le commentaire de votre choix ici :

**49 [DOSS MED] Si un projet thérapeutique existe, est-il inscrit dans le dossier médical ?**

Veillez sélectionner **une seule** des propositions suivantes :

- Toujours
- Souvent
- Parfois
- Jamais
- Je ne sais pas

Faites le commentaire de votre choix ici :

**50 [DOSS INF] Si un projet thérapeutique existe, est-il inscrit dans le dossier infirmier ?**

Veillez sélectionner **une seule** des propositions suivantes :

- Toujours
- Souvent
- Parfois
- Jamais
- Je ne sais pas

Faites le commentaire de votre choix ici :

**51 [AVIS PARENTS] Vous arrive-t-il de démarrer un projet thérapeutique palliatif...**

Choisissez la réponse appropriée pour chaque élément :

|                                 | Oui                   | Incertain             | Non                   |
|---------------------------------|-----------------------|-----------------------|-----------------------|
| ...sans en informer les parents | <input type="radio"/> | <input type="radio"/> | <input type="radio"/> |
| ...contre l'avis des parents    | <input type="radio"/> | <input type="radio"/> | <input type="radio"/> |

**52 [FIn ACTIVE] Dans le cadre d'un projet thérapeutique palliatif, vous arrive-t-il de pratiquer une fin de vie active (utilisation de médicaments d'analgésie et/ou de sédation à des doses supra thérapeutiques) ?**

Veillez sélectionner **une seule** des propositions suivantes :

- OUI  
 NON  
 Je ne sais pas

Faites le commentaire de votre choix ici :

**53 [INFO PARENTS] En cas de décision de pratiquer une fin de vie active, en informez-vous les parents?**

Veillez sélectionner **une seule** des propositions suivantes :

- Toujours  
 Souvent  
 Parfois  
 Jamais  
 Je ne pratique jamais de fin de vie active  
 Sans avis

**54 [MOTIF] Lorsque vous pratiquez une fin de vie active, les motifs de la décision sont :**

Choisissez la réponse appropriée pour chaque élément :

|                                                                                        | Toujours              | Souvent               | Parfois               | Exceptionnellement    | Jamais                | Je ne sais pas        |
|----------------------------------------------------------------------------------------|-----------------------|-----------------------|-----------------------|-----------------------|-----------------------|-----------------------|
| Éviter une qualité de vie future médiocre (conviction qu'il y aura un handicap majeur) | <input type="radio"/> | <input type="radio"/> | <input type="radio"/> | <input type="radio"/> | <input type="radio"/> | <input type="radio"/> |
| Soulager des souffrances chez le bébé, jugées inutiles                                 | <input type="radio"/> | <input type="radio"/> | <input type="radio"/> | <input type="radio"/> | <input type="radio"/> | <input type="radio"/> |
| Répondre aux demandes (pressions) parentales                                           | <input type="radio"/> | <input type="radio"/> | <input type="radio"/> | <input type="radio"/> | <input type="radio"/> | <input type="radio"/> |
| Répondre aux demandes (pressions) de l'équipe soignante                                | <input type="radio"/> | <input type="radio"/> | <input type="radio"/> | <input type="radio"/> | <input type="radio"/> | <input type="radio"/> |
| Autre                                                                                  | <input type="radio"/> | <input type="radio"/> | <input type="radio"/> | <input type="radio"/> | <input type="radio"/> | <input type="radio"/> |

**55 [MOTIF-autre] Si vous avez indiqué "autre" à la question précédente, merci de préciser :**

Veillez écrire votre réponse ici :

**56 [DECES] En cas de décès, proposez-vous :**

Choisissez la réponse appropriée pour chaque élément :

|                | Toujours              | Souvent               | Parfois               | Jamais                | Je ne sais pas        |
|----------------|-----------------------|-----------------------|-----------------------|-----------------------|-----------------------|
| Une autopsie ? | <input type="radio"/> | <input type="radio"/> | <input type="radio"/> | <input type="radio"/> | <input type="radio"/> |
| Une IRM ?      | <input type="radio"/> | <input type="radio"/> | <input type="radio"/> | <input type="radio"/> | <input type="radio"/> |
| Les 2 ?        | <input type="radio"/> | <input type="radio"/> | <input type="radio"/> | <input type="radio"/> | <input type="radio"/> |

**57 [TEMPS] Vous arrive-t-il de postposer le moment du décès, afin de laisser du temps...**

Choisissez la réponse appropriée pour chaque élément :

|                               | Oui                   | Incertain             | Non                   |
|-------------------------------|-----------------------|-----------------------|-----------------------|
| ...au cheminement des parents | <input type="radio"/> | <input type="radio"/> | <input type="radio"/> |
| ...au cheminement de l'équipe | <input type="radio"/> | <input type="radio"/> | <input type="radio"/> |

**58 [RITUELS] Proposez-vous des rituels standardisés après le décès du bébé?**Veuillez sélectionner **une seule** des propositions suivantes :

- Oui  
 Non

**59 [RITUELS1] Si vous proposez des rituels après le décès, qui se charge préférentiellement de ces rituels ?**

Choisissez la réponse appropriée pour chaque élément :

|                                            | Infirmière des soins  | Infirmière sociale    | Sage-femme            | Néonatalogue          | Psychologue           | Ministre du culte     | Bénévole de l'aumônerie | Membre d'une association de parents | Autre                 | Nous ne proposons pas ce rituel |
|--------------------------------------------|-----------------------|-----------------------|-----------------------|-----------------------|-----------------------|-----------------------|-------------------------|-------------------------------------|-----------------------|---------------------------------|
| Religieux                                  | <input type="radio"/> | <input type="radio"/> | <input type="radio"/> | <input type="radio"/> | <input type="radio"/> | <input type="radio"/> | <input type="radio"/>   | <input type="radio"/>               | <input type="radio"/> | <input type="radio"/>           |
| Accueil des membres élargis de la famille  | <input type="radio"/> | <input type="radio"/> | <input type="radio"/> | <input type="radio"/> | <input type="radio"/> | <input type="radio"/> | <input type="radio"/>   | <input type="radio"/>               | <input type="radio"/> | <input type="radio"/>           |
| Objet souvenir (photo, empreinte, cheveux) | <input type="radio"/> | <input type="radio"/> | <input type="radio"/> | <input type="radio"/> | <input type="radio"/> | <input type="radio"/> | <input type="radio"/>   | <input type="radio"/>               | <input type="radio"/> | <input type="radio"/>           |
| Autre                                      | <input type="radio"/> | <input type="radio"/> | <input type="radio"/> | <input type="radio"/> | <input type="radio"/> | <input type="radio"/> | <input type="radio"/>   | <input type="radio"/>               | <input type="radio"/> | <input type="radio"/>           |

**60 [RITUELautre] Si vous pratiquez d'autres rituels ou que d'autres personnes sont impliquées, merci de préciser:**

Veuillez écrire votre réponse ici :

**61 [ACC] Proposez-vous un accompagnement des parents endeuillés ?**

Choisissez la réponse appropriée pour chaque élément :

|                                                         | Toujours              | Souvent               | Parfois               | Jamais                | Sans avis             |
|---------------------------------------------------------|-----------------------|-----------------------|-----------------------|-----------------------|-----------------------|
| En cas de décès du bébé à la naissance SANS REANIMATION | <input type="radio"/> | <input type="radio"/> | <input type="radio"/> | <input type="radio"/> | <input type="radio"/> |
| En cas de décès du bébé APRES REANIMATION               | <input type="radio"/> | <input type="radio"/> | <input type="radio"/> | <input type="radio"/> | <input type="radio"/> |

**62 [ACC2] Si vous proposez un accompagnement des parents endeuillés, quelles formes d'accompagnement proposez-vous et qui en prend l'initiative ?**

Choisissez la réponse appropriée pour chaque élément :

|                                                       | ACCOMPAGNEMENT AU MOMENT DU DECES |                                           |                                                              |                                                        |                       | ACCOMPAGNEMENT A DISTANCE DU DECES |                                           |                                                              |                                                        |                       |
|-------------------------------------------------------|-----------------------------------|-------------------------------------------|--------------------------------------------------------------|--------------------------------------------------------|-----------------------|------------------------------------|-------------------------------------------|--------------------------------------------------------------|--------------------------------------------------------|-----------------------|
|                                                       | Toujours proposé                  | Proposé si les parents en font la demande | Proposé si nous percevons que les parents sont en difficulté | L'initiative peut venir des parents ou de notre équipe | Jamais proposé        | Toujours proposé                   | Proposé si les parents en font la demande | Proposé si nous percevons que les parents sont en difficulté | L'initiative peut venir des parents ou de notre équipe | Jamais proposé        |
| Groupe de parole                                      | <input type="radio"/>             | <input type="radio"/>                     | <input type="radio"/>                                        | <input type="radio"/>                                  | <input type="radio"/> | <input type="radio"/>              | <input type="radio"/>                     | <input type="radio"/>                                        | <input type="radio"/>                                  | <input type="radio"/> |
| Rencontre avec un(e) psychologue au sein de l'hôpital | <input type="radio"/>             | <input type="radio"/>                     | <input type="radio"/>                                        | <input type="radio"/>                                  | <input type="radio"/> | <input type="radio"/>              | <input type="radio"/>                     | <input type="radio"/>                                        | <input type="radio"/>                                  | <input type="radio"/> |
| Orientation vers une association                      | <input type="radio"/>             | <input type="radio"/>                     | <input type="radio"/>                                        | <input type="radio"/>                                  | <input type="radio"/> | <input type="radio"/>              | <input type="radio"/>                     | <input type="radio"/>                                        | <input type="radio"/>                                  | <input type="radio"/> |
| Contact avec des parents ressources                   | <input type="radio"/>             | <input type="radio"/>                     | <input type="radio"/>                                        | <input type="radio"/>                                  | <input type="radio"/> | <input type="radio"/>              | <input type="radio"/>                     | <input type="radio"/>                                        | <input type="radio"/>                                  | <input type="radio"/> |
| Autre                                                 | <input type="radio"/>             | <input type="radio"/>                     | <input type="radio"/>                                        | <input type="radio"/>                                  | <input type="radio"/> | <input type="radio"/>              | <input type="radio"/>                     | <input type="radio"/>                                        | <input type="radio"/>                                  | <input type="radio"/> |

**63 [ACC-autre] Si vous avez coché "autre" à la question précédente, pouvez-vous préciser :**

Veuillez écrire votre réponse ici :

**64 [ACC3] Lorsque les parents sont revus à distance du décès, l'initiative provient de :**

Veuillez choisir toutes les réponses qui conviennent et laissez un commentaire :

- L'équipe soignante
- Les parents
- Ca dépend

## Aspect légal

Cette partie vous interroge sur ce que vous pensez personnellement en lien avec les aspects formels et juridiques liés aux décisions de fin de vie en néonatalogie.

### 65 [PEUR] Lorsque vous prenez une décision, vous arrive-t-il de craindre d'éventuelles actions médico-légales et/ou poursuites judiciaires ?

Choisissez la réponse appropriée pour chaque élément :

|                                                                   | CRAINTES POUR VOUS-MEME |                       |                       |                       |                       | CRAINTES POUR VOTRE CENTRE |                       |                       |                       |                       |
|-------------------------------------------------------------------|-------------------------|-----------------------|-----------------------|-----------------------|-----------------------|----------------------------|-----------------------|-----------------------|-----------------------|-----------------------|
|                                                                   | Toujours                | Souvent               | Parfois               | Exceptionnellement    | Jamais                | Toujours                   | Souvent               | Parfois               | Exceptionnellement    | Jamais                |
| En cas de décision de non-réanimation                             | <input type="radio"/>   | <input type="radio"/> | <input type="radio"/> | <input type="radio"/> | <input type="radio"/> | <input type="radio"/>      | <input type="radio"/> | <input type="radio"/> | <input type="radio"/> | <input type="radio"/> |
| En cas de décision de soins palliatifs (arrêt des soins curatifs) | <input type="radio"/>   | <input type="radio"/> | <input type="radio"/> | <input type="radio"/> | <input type="radio"/> | <input type="radio"/>      | <input type="radio"/> | <input type="radio"/> | <input type="radio"/> | <input type="radio"/> |
| En cas de décision de pratique de fin de vie active               | <input type="radio"/>   | <input type="radio"/> | <input type="radio"/> | <input type="radio"/> | <input type="radio"/> | <input type="radio"/>      | <input type="radio"/> | <input type="radio"/> | <input type="radio"/> | <input type="radio"/> |

### 66 [PEUR-qui] S'il vous arrive de craindre d'éventuelles actions médico-légales et/ou poursuites judiciaires, qui peut être à la source de vos craintes?

Choisissez la réponse appropriée pour chaque élément :

|                          | Oui, cette craint a déjà existé | Oui, cette crainte pourrait exister | Non                   |
|--------------------------|---------------------------------|-------------------------------------|-----------------------|
| Les parents              | <input type="radio"/>           | <input type="radio"/>               | <input type="radio"/> |
| Des membres du personnel | <input type="radio"/>           | <input type="radio"/>               | <input type="radio"/> |
| Autre ou ça dépend       | <input type="radio"/>           | <input type="radio"/>               | <input type="radio"/> |

### 67 [PEUR-autre] Si vous avez indiqué "autre ou ça dépend" à la question précédente, pouvez-vous préciser :

Veuillez écrire votre réponse ici :

### 68 [TXT] Souhaitez-vous que les conduites à tenir en cas de fin de vie active dans les situations de grande prématurité soient encadrées...

Choisissez la réponse appropriée pour chaque élément :

|                    | Oui                   | Incertain             | Non                   |
|--------------------|-----------------------|-----------------------|-----------------------|
| par un protocole   | <input type="radio"/> | <input type="radio"/> | <input type="radio"/> |
| par un texte légal | <input type="radio"/> | <input type="radio"/> | <input type="radio"/> |

### 69 [TXT2] Souhaitez-vous que les pratiques de fin de vie actives dans les situations de grande prématurité soient autorisées...

Choisissez la réponse appropriée pour chaque élément :

|                    | Oui                   | Incertain             | Non                   |
|--------------------|-----------------------|-----------------------|-----------------------|
| par un protocole   | <input type="radio"/> | <input type="radio"/> | <input type="radio"/> |
| par un texte légal | <input type="radio"/> | <input type="radio"/> | <input type="radio"/> |

**70 [COMM]Vous pouvez commenter vos réponses ici si vous le souhaitez :**

Veuillez écrire votre réponse ici :

## Commentaire final

**71 [COMM FIN]Vous arrivez à la fin du questionnaire. Après avoir cliqué sur le bouton "envoyer", il ne vous sera plus possible de revenir en arrière. Si vous souhaitez laisser un commentaire ou poser une question, vous pouvez le faire ici :**

Veuillez écrire votre réponse ici :

**Merci d'avoir répondu à ce questionnaire.**

Pour toute question ou préoccupation, n'hésitez pas à prendre contact avec moi ou avec le responsable de votre centre.

**Isabelle Aujoulat**

Coordinatrice de l'étude

Institut de Recherche Santé et Société, UCL

E-mail : [isabelle.aujoulat@uclouvain.be](mailto:isabelle.aujoulat@uclouvain.be)

Téléphone : 0487.66.41.49

01.01.1970 – 01:00

Envoyer votre questionnaire.  
Merci d'avoir complété ce questionnaire.
